# Supplementary material for: A bifunctional self-powered electrochromic and thermochromic smart window with enhanced privacy protection ability
Source: Royal Society of Chemistry journal article supplement (doi:10.1039/d4ta06690a), 2024-12-12
Supplement: d4ta06690a1.pdf [file d4ta06690a1.pdf]

## Supporting Information

# **A bifunctional self-powered electrochromic and thermochromic smart window with enhanced privacy protection ability**

Wanxiong Yong,<sup>a</sup> Weining Liu,<sup>a</sup> Xiaoying Xin<sup>a</sup> and Guodong Fu<sup>\*a</sup>

<sup>a</sup> School of Chemistry and Chemical Engineering, Southeast University

Email: 101010855@seu.edu.cn

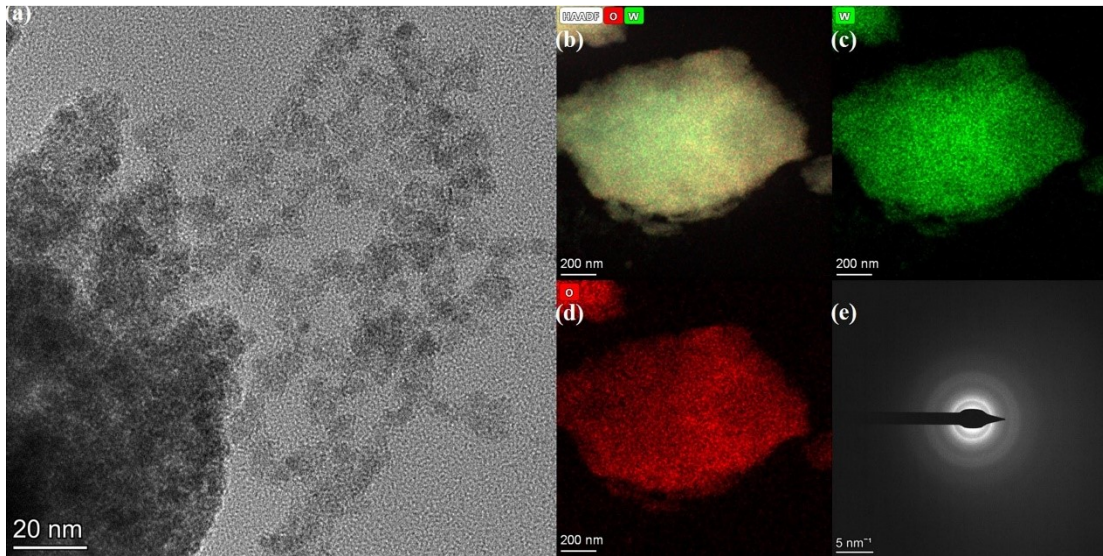

**Fig. S1** (a) The TEM micrographs, (b-d) the EDS mapping images and (e) the Electron diffraction pattern of  $\text{WO}_3$ .

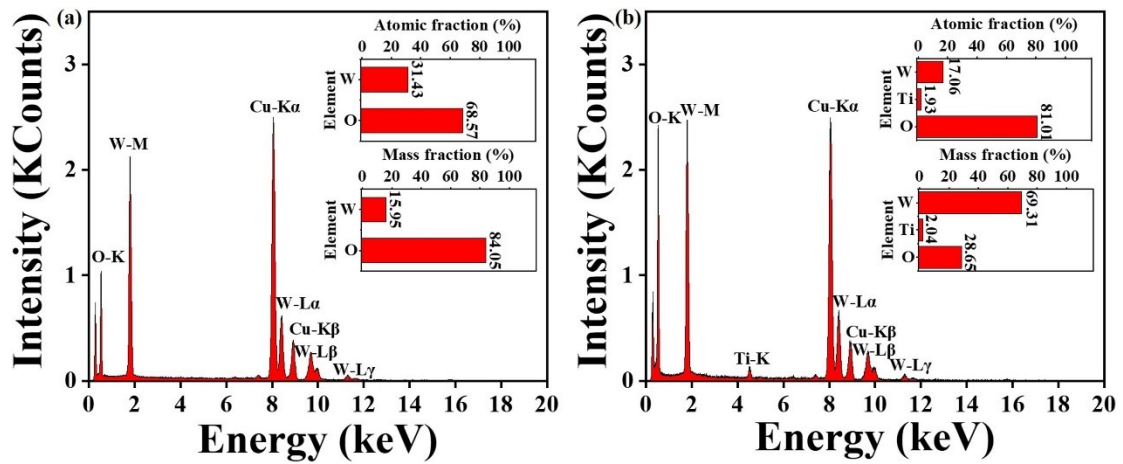

**Fig. S2** (a) the EDS of  $\text{WO}_3$ , (b) the EDS of Ti doped  $\text{WO}_3$ .

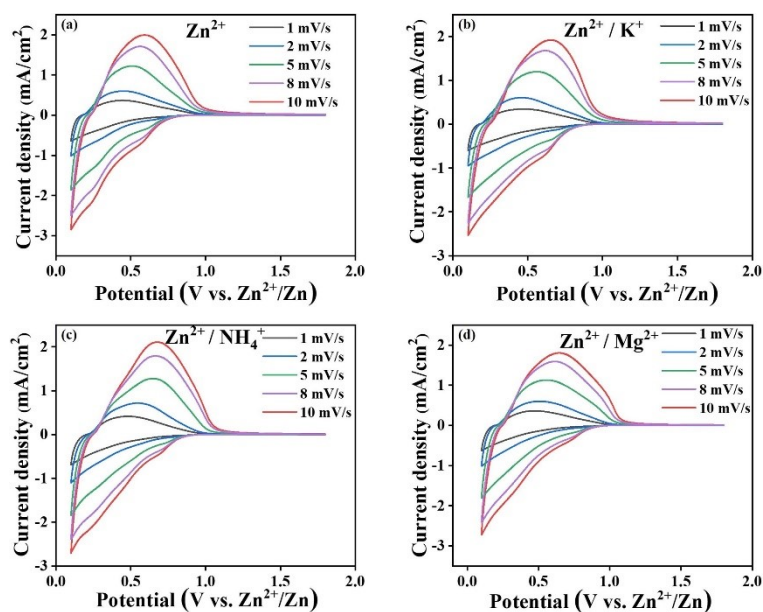

**Fig. S3** CV curves at different scan rates: (a)  $\text{Zn}^{2+}$  electrolyte device; (b) hybrid  $\text{Zn}^{2+}/\text{K}^+$  electrolyte device; (c) hybrid  $\text{Zn}^{2+}/\text{NH}_4^+$  electrolyte device; (d) hybrid  $\text{Zn}^{2+}/\text{Mg}^{2+}$  electrolyte device.

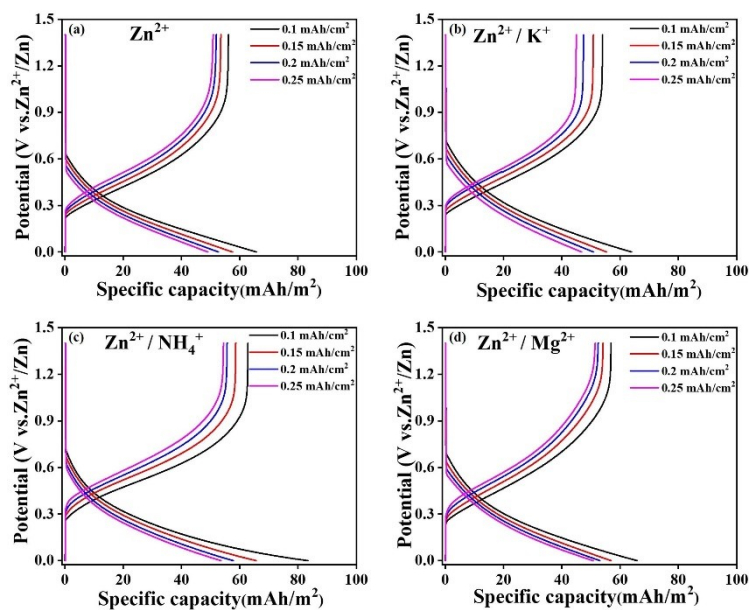

**Fig. S4** GCD curves at various current densities: (a)  $\text{Zn}^{2+}$  electrolyte device; (b) hybrid  $\text{Zn}^{2+}/\text{K}^+$  electrolyte device; (c) hybrid  $\text{Zn}^{2+}/\text{NH}_4^+$  electrolyte device; (d) hybrid  $\text{Zn}^{2+}/\text{Mg}^{2+}$  electrolyte device.

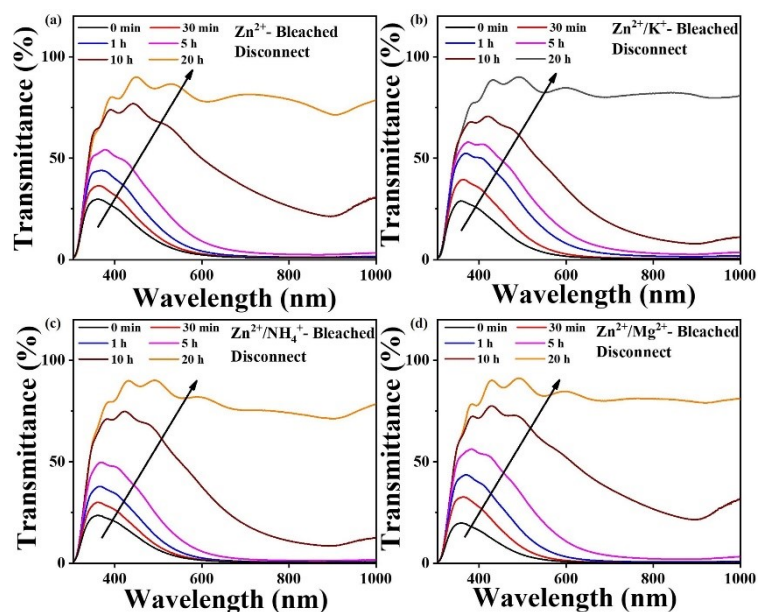

**Fig. S5** The transmittance at different moments in the disconnecting process: (a)  $\text{Zn}^{2+}$  electrolyte device; (b) hybrid  $\text{Zn}^{2+}/\text{K}^+$  electrolyte device; (c) hybrid  $\text{Zn}^{2+}/\text{NH}_4^+$  electrolyte device; (d) hybrid  $\text{Zn}^{2+}/\text{Mg}^{2+}$  electrolyte device.

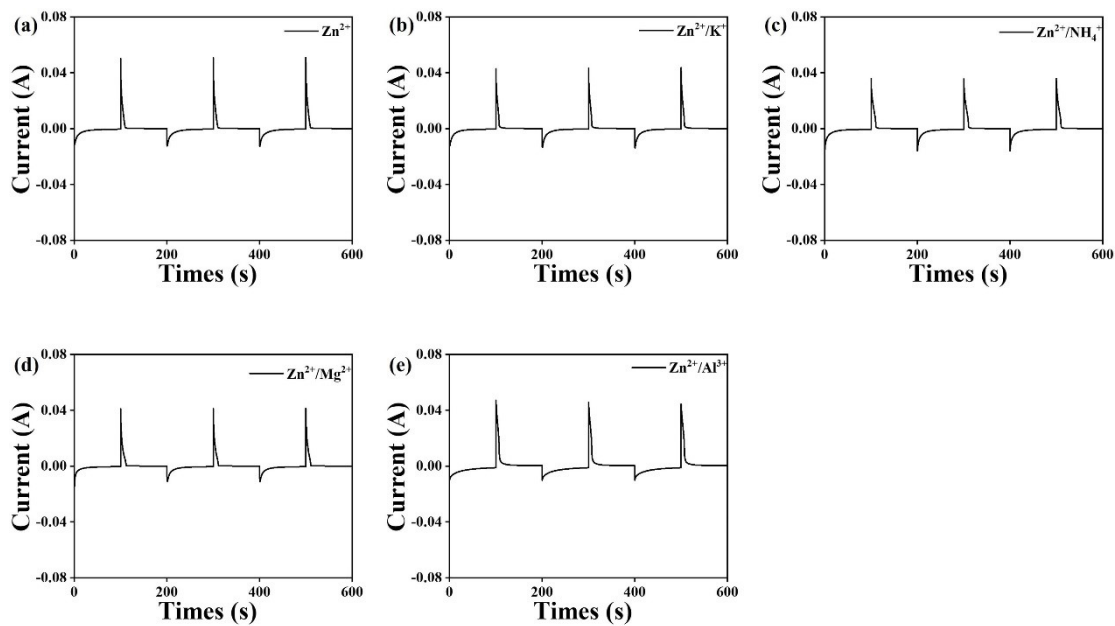

**Fig. S6** The current-time curves: (a)  $\text{Zn}^{2+}$  electrolyte device; (b) hybrid  $\text{Zn}^{2+}/\text{K}^+$  electrolyte device; (c) hybrid  $\text{Zn}^{2+}/\text{NH}_4^+$  electrolyte device; (d) hybrid  $\text{Zn}^{2+}/\text{Mg}^{2+}$  electrolyte device; (e) hybrid  $\text{Zn}^{2+}/\text{Al}^{3+}$  electrolyte device.

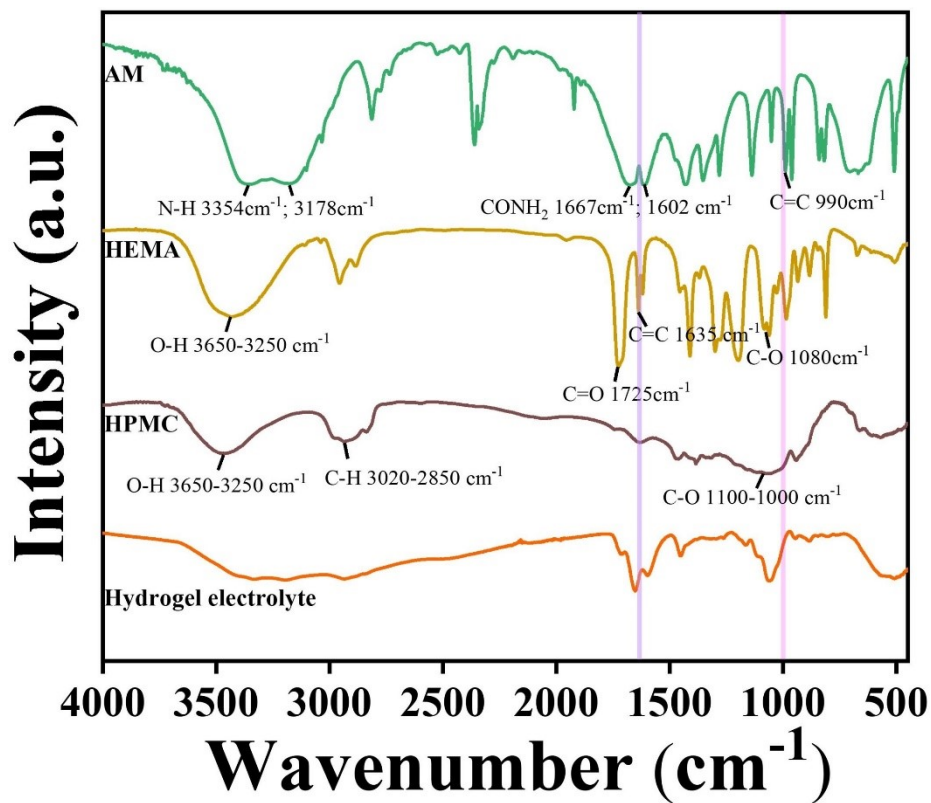

**Fig. S7** FT-IR spectra of AM, HEMA, HPMC and Hydrogel electrolyte.

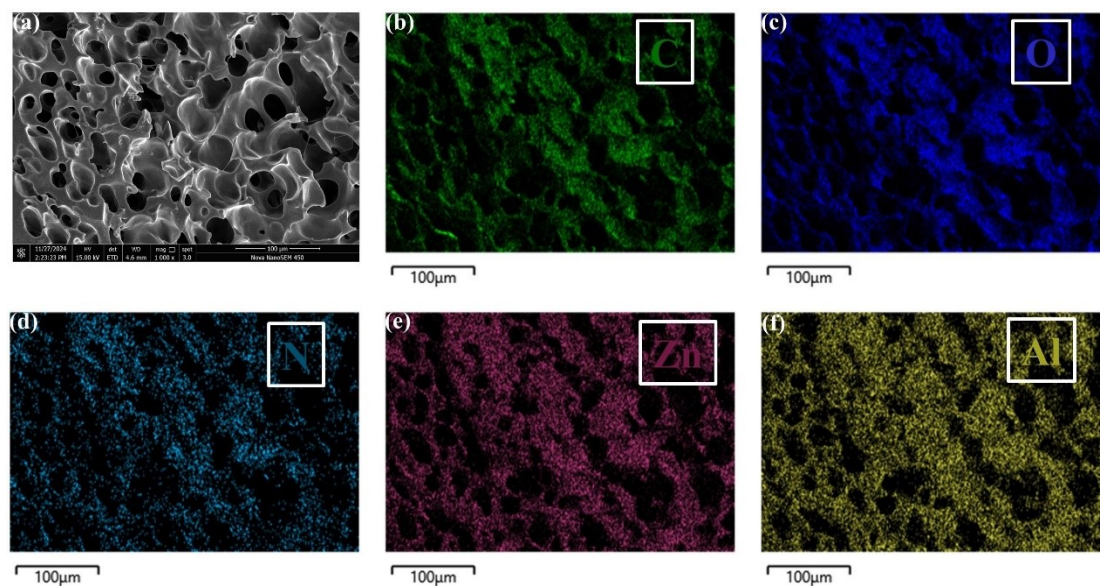

**Fig. S8** (a) the SEM image of hydrogel electrolyte, (b–f) images of element mapping of C, O, N,  $\text{Zn}^{2+}$ ,  $\text{Al}^{3+}$  for hydrogel electrolyte



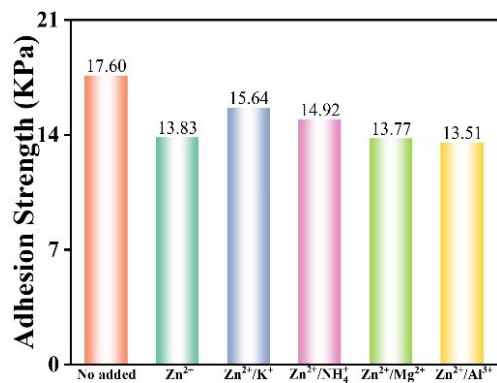

**Fig. S9** The adhesive strength of hydrogels with various cation combinations.

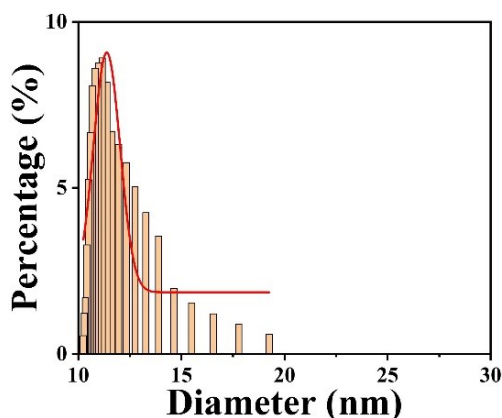

**Fig. S10** The particle size distribution diagrams of 10% Ti doped WO<sub>3</sub> by DLS.

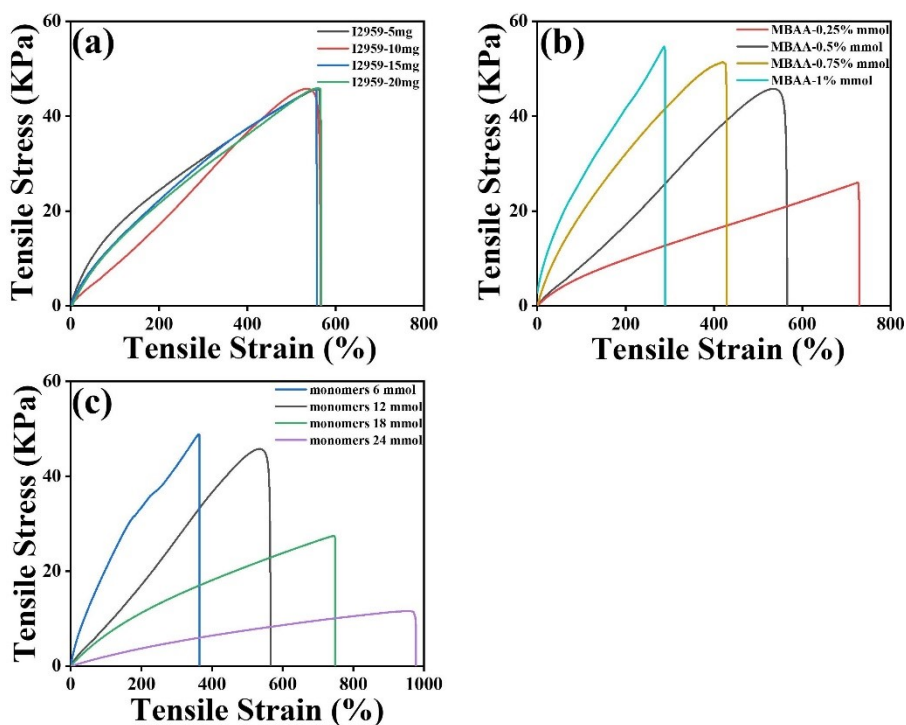

**Fig. S11** The mechanical properties at varying concentrations of (a) the initiator, (b) crosslinker, and (c) monomer.
